# Supplementary material for: Reversal of Aberrant Cancer Methylome and Transcriptome upon Direct Reprogramming of Lung Cancer Cells
Source: PubMed Central journal article supplement — Sci Rep. 2012 Aug 21;2:592. doi: 10.1038/srep00592 (PMC3423637; doi:10.1038/srep00592), 2012-08-21
Supplement: srep00592-s1.pdf [file srep00592-s1.pdf]

**Reversal of Aberrant Cancer Methylome and Transcriptome upon Direct  
Reprogramming of Lung Cancer Cells**

**Dashayini Mahalingam<sup>1</sup>, Chiou Mee Kong<sup>1</sup>, Jason Lai<sup>1</sup>, Ling Lee Tay<sup>1</sup>, Henry  
Yang<sup>2</sup>, Xueying Wang<sup>1\*</sup>**

## **Supplementary Information**

### **Supplementary Table Legends**

**Table S1** List of aberrantly methylated promoters (AMP).

**Table S2** List of AMPs identified in cancer cells that were hypomethylated upon reprogramming.

**Table S3** List of commonly upregulated genes in lung cancer.

**Table S4** List of URs identified in cancer cells that were downregulated upon reprogramming.

**Table S5** List of OGs identified in cancer cells that were downregulated upon reprogramming.

**Table S6** List of TSs identified in cancer cells that were upregulated upon reprogramming.

**Table S7** Primer sequences.

## Supplementary Figure Legends

**Figure S1** Bisulfite sequencing analysis was used to quantify the methylation levels in iPC cells and parent cancer cells. (a) iPCH358 and iPCH460 were unmethylated in *HOXA5* gene promoters as shown by bisulfite sequencing. (b) Bisulfite sequencing analysis revealed high significant increases in methylation levels in iPC cells for *KRT19* gene. White circles represent unmethylated CpGs; black circles denote methylated CpGs. Numbers indicate the percentage of methylated CpGs.

**Table S1: Lists of aberrantly methylated promoters (AMP)**

| References                                         | Descriptions                                         | Genes                                                                                                                                                                         |
|----------------------------------------------------|------------------------------------------------------|-------------------------------------------------------------------------------------------------------------------------------------------------------------------------------|
| Human Lung Cancer<br>EpiTect Methyl qPCR<br>Arrays | Apoptosis & Anti-apoptosis                           | ACIN1<br><br>APC<br>BRCA1<br>CADM1<br>CDKN1C<br>CDKN2A<br>CDKN2A<br>CDKN2B<br>DAPK1<br>ENG<br>FHIT<br>PGF<br>PTEN<br>PYCARD<br>RECK<br>SFN<br>TNFRSF10C<br>TNFRSF25<br>TWIST1 |
|                                                    | Bone Morphogenesis Signaling<br>Pathway              | GREM1                                                                                                                                                                         |
|                                                    | Cell Adhesion & Migration                            | APC<br>CADM1<br>CDH1<br>CDH13<br>CTNNB1<br>DLC1<br>ENG<br>OPCML                                                                                                               |
|                                                    | Cell Adhesion Molecule-Like Genes                    | ROBO1<br>THBS1                                                                                                                                                                |
|                                                    | Cell Cycle, Growth, Differentiation<br>& Development | AKAP12<br>ALDH1A3<br>APC<br>BRCA1                                                                                                                                             |

|                                  |                                                                                                                                                                                                                                                                                                                                                                     |
|----------------------------------|---------------------------------------------------------------------------------------------------------------------------------------------------------------------------------------------------------------------------------------------------------------------------------------------------------------------------------------------------------------------|
|                                  | <p>CADM1<br/> CCNA1<br/> CCND2<br/> CDKN1A<br/> CDKN1C<br/> CDKN1C<br/> CDKN2A<br/> CDKN2B<br/> CEBPA<br/> DLC1<br/> FHIT<br/> GADD45G<br/> GREM1<br/> HOXC9<br/> HOXD1<br/> IGFBP3<br/> MLH1<br/> ONECUT2<br/> PGF<br/> PRDM2<br/> PTEN<br/> RARB<br/> RASSF1<br/> RASSF2<br/> RASSF4<br/> SFN<br/> SPARC<br/> TCF21<br/> TGFBI<br/> TWIST1<br/> WIF1<br/> XPC</p> |
| Chemokines, Cytokines & Receptor | <p>CXCL12<br/> IL20RA<br/> TNFRSF10C<br/> TNFRSF25</p>                                                                                                                                                                                                                                                                                                              |
| Neuronal Adaptor Protein         | <p>APBA1</p>                                                                                                                                                                                                                                                                                                                                                        |
| DNA Damage Repair                | <p>APC<br/> BRCA1</p>                                                                                                                                                                                                                                                                                                                                               |

|                                     |                                                                    |
|-------------------------------------|--------------------------------------------------------------------|
|                                     | CDKN1A<br>FANCF<br>MLH1<br>RASSF1<br>RASSF4<br>WRN<br>XPC<br>XRCC5 |
| DNA Methyltransferases              | MGMT<br>PRDM2                                                      |
| Drug Metabolism                     | CYP1A1<br>CYP1B1<br>GSTP1                                          |
| Dual Oxidase                        | DUOX2                                                              |
| Extracellular Matrix Remodeling     | LOX<br>SLIT2<br>SPARC<br>TGFB1<br>THBS1<br>WIF1                    |
| Oncogene                            | PAX5                                                               |
| Tumor Suppressors                   | DIRAS3<br>MT1G<br>SCGB3A1                                          |
| Growth Factors                      | GDNF<br>IGFBP7<br>PGF<br>WIF1                                      |
| GTPase Activating Proteins          | RASGRF2<br>DAB2IP                                                  |
| Heparan Sulfate Biosynthetic Enzyme | HS3ST2                                                             |
| Histidine Triad Gene Family         | FHIT                                                               |
| Hormone Receptor                    | ESR1                                                               |
| Hypoxia Response                    | PTEN                                                               |
| Inflammation                        | PYCARD                                                             |
| Insulin Signaling Pathway           | CDX2<br>IGFBP3                                                     |
| Lipid Metabolism                    | LRP1B                                                              |
| Nuclear Receptors                   | ESR1                                                               |

|                                                   |                                                                                                                                              |
|---------------------------------------------------|----------------------------------------------------------------------------------------------------------------------------------------------|
|                                                   | RARB                                                                                                                                         |
| Oncogene                                          | ENG                                                                                                                                          |
| One Carbon Unit Metabolism                        | MTHFR                                                                                                                                        |
| p53 Signaling Pathway                             | RPRM<br>XPC                                                                                                                                  |
| PI3 Kinase Signaling Pathway                      | PTEN                                                                                                                                         |
| Proteases & Protease Inhibitors                   | CTSZ<br>PRSS3<br>THBS1                                                                                                                       |
| Protein Kinases & Protein Kinase Adaptor Proteins | AKAP12<br>DAB2IP<br>PRKCDBP                                                                                                                  |
| Pure Cerebellar Ataxia                            | SYNE1                                                                                                                                        |
| Retinoid Acid Signaling                           | ALDH1A3<br>RARB                                                                                                                              |
| TGF $\beta$ Signaling Pathway                     | BRCA1                                                                                                                                        |
| Transcription Factors                             | CDX2<br>CEBPA<br>GATA4<br>GATA5<br>GATA6<br>HOXA5<br>HOXC9<br>HOXD1<br>MSX1<br>ONECUT2<br>PAX5<br>PRDM1<br>RUNX3<br>TCF21<br>TGFBI<br>TWIST1 |
| Tumor Suppressor Gene Candidates                  | APC<br>BRCA1<br>CDKN1A<br>CDKN1C<br>CDKN2A<br>CDKN2A<br>CDKN2B                                                                               |

|                                                                                                                                                                                   |                                                                          |                                                                                                             |
|-----------------------------------------------------------------------------------------------------------------------------------------------------------------------------------|--------------------------------------------------------------------------|-------------------------------------------------------------------------------------------------------------|
|                                                                                                                                                                                   |                                                                          | <p>ENG<br/>LRP1B<br/>MLH1<br/>PRKCDBP<br/>PTEN<br/>RASSF1<br/>RASSF2<br/>RECK<br/>RUNX3<br/>SFN<br/>XPC</p> |
|                                                                                                                                                                                   | Wnt Signaling                                                            | <p>APC<br/>SFRP1<br/>SFRP2<br/>SFRP4</p>                                                                    |
|                                                                                                                                                                                   | Others                                                                   | <p>C20orf85<br/>GP1BB<br/>RAMP2<br/>ZMYND10<br/>HTR1B</p>                                                   |
| <p>Shames D.S. et al. A genome-wide screen for promoter methylation in lung cancer identifies novel methylation markers for multiple malignancies. Plos Med 2006; 3(12): e486</p> | Well-established methylation markers that have tumor suppressor activity | <p>CDH1<br/>p16<br/>RASSF1<br/>SFRP1<br/>TIMP3</p>                                                          |
|                                                                                                                                                                                   | Novel methylation candidates in NSCLC                                    | <p>BIK<br/>CCNA1<br/>DUSP1<br/>LOX<br/>TFPI2<br/>TWIST1</p>                                                 |
| <p>Zöchbauer-Müller S et al. Aberrant DNA methylation in lung cancer: biological and clinical implications. Oncologists 2002; 7 (5): 451-457</p>                                  | Methylated genes in lung cancers                                         | <p>APC<br/>CDH1<br/>CDH13<br/>DAPK1<br/>FHIT<br/>MGMT<br/>P16<br/>RARB</p>                                  |



|                                                                                                                                                                                       |                                                                                              |                                                                                                                                                                                                                                                                                                                                           |
|---------------------------------------------------------------------------------------------------------------------------------------------------------------------------------------|----------------------------------------------------------------------------------------------|-------------------------------------------------------------------------------------------------------------------------------------------------------------------------------------------------------------------------------------------------------------------------------------------------------------------------------------------|
|                                                                                                                                                                                       |                                                                                              | RASSF1<br>TIMP-3                                                                                                                                                                                                                                                                                                                          |
| Rauch T et al. Homeobox gene methylation in lung cancer studied by genome-wide analysis with a microarray-based methylated CpG island recovery assay. PNAS (2007) 104 (13): 5527-5532 | Preferential targets for DNA methylation in cancer cell lines and in early-stage lung cancer | HOXA1<br>HOXA2<br>HOXA3<br>HOXA4<br>HOXA5<br>HOXA6<br>HOXA7<br>HOXA9<br>HOXA10<br>HOXA11<br>HOXA13<br>HOXB1<br>HOXB2<br>HOXB3<br>HOXB4<br>HOXB5<br>HOXB6<br>HOXB7<br>HOXB8<br>HOXB9<br>HOXC4<br>HOXC5<br>HOXC6<br>HOXC8<br>HOXC9<br>HOXC10<br>HOXC11<br>HOXC12<br>HOXC13<br>HOXD1<br>HOSD3<br>HOXD4<br>HOXD8<br>HOXD9<br>HOXD10<br>HOXD11 |

|                                                                                                                                                     |  |                                                                                                                                                                                                              |
|-----------------------------------------------------------------------------------------------------------------------------------------------------|--|--------------------------------------------------------------------------------------------------------------------------------------------------------------------------------------------------------------|
|                                                                                                                                                     |  | HOXD12<br>HOXD13<br>EN1<br>EN2<br>LHX1<br>PAX2<br>PAX3<br>PAX5<br>PAX6<br>PAX7<br>PAX9<br>SIX2<br>SIX3                                                                                                       |
| <p>Tsou JA et al (2002). DNA methylation analysis: a powerful new tool for lung cancer diagnosis. <i>Oncogene</i> (2002) 12: 21 (35): 5450-5461</p> |  | AR<br>APC<br>BCL2<br>CALCA<br>CDH1<br>CDH13<br>CDKN2A<br>DAPK1<br>EDN1<br>EGFR<br>ESR1<br>ESR2<br>FHIT<br>GDF10<br>GSTP1<br>HIC1<br>HOXB<br>HTR1B<br>MGMT<br>MTHFR<br>MYOD1<br>PGR<br>PTGS2<br>PTHLH<br>RARB |

|                                                                                                                                      |                        |                                                                                                                                                                                                                                                                                                         |
|--------------------------------------------------------------------------------------------------------------------------------------|------------------------|---------------------------------------------------------------------------------------------------------------------------------------------------------------------------------------------------------------------------------------------------------------------------------------------------------|
|                                                                                                                                      |                        | RASSF1<br>PRDM2<br>S100A2<br>PRKCDBP<br>TIMP3<br>CADM1                                                                                                                                                                                                                                                  |
| Helman et al. (2011) DNA hypermethylation in lung cancer is targeted at differentiation-associated genes. <i>Oncogene</i> (2011) 1-8 | Tumor vs normal sample | MSC<br>SOX2<br>BARHL2<br>HOXD9<br>SALL3<br>PRDM13<br>LOC442425<br>PROX1<br>OTX1<br>C20orf103<br>ST8SIA3<br>IRX2<br>SOX21<br>VAX1<br>LRRTM1<br>FOXD3<br>TFAP2A<br>RUNX1<br>WT1<br>FAM19A2<br>EN1<br>SIM2<br>INSM1<br>ZNF497<br>HOXD13<br>ECAT1<br>BOLL<br>NXPH1<br>ZIC4<br>DMRT3<br>KATNAL2<br>LOC389549 |

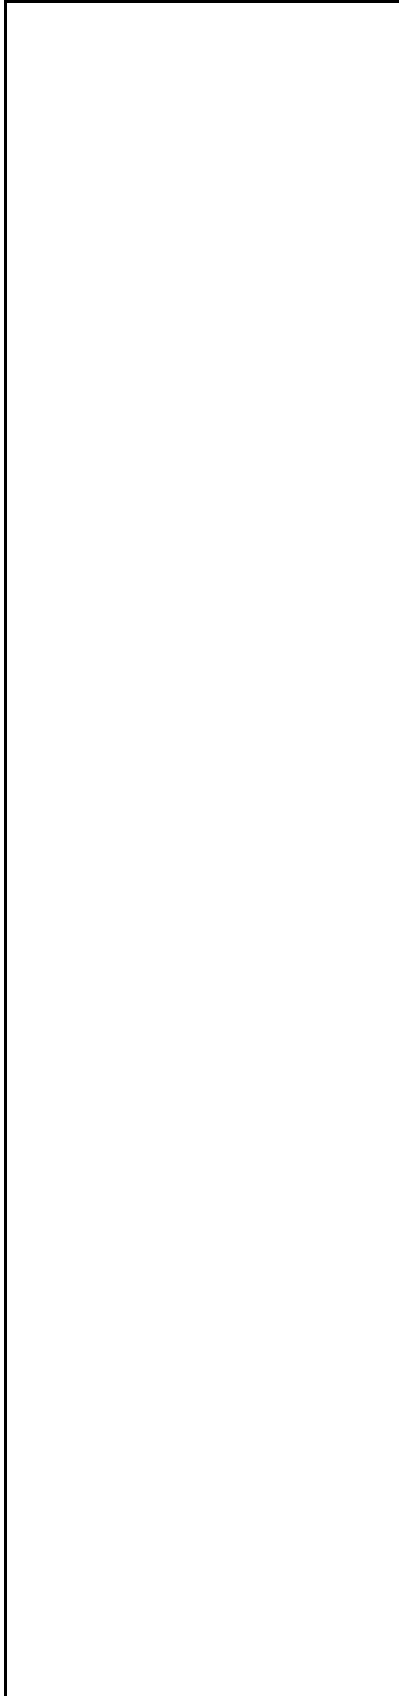

FLJ46347  
ONECUT2  
CBLN4  
LBXCOR1  
PAX6  
SIX6  
GSC  
EPS8L1  
HOXD10  
PCDHGA12  
EN2  
HMX2  
NRN1  
PCGF4  
PAX9  
ALX3  
SLC32A1  
OSR2  
TRIM59  
HOXC13  
MAFB  
LHX9  
SIM1  
ZIC1  
LHX2  
ZNF577  
SPATA17  
MEIS1  
GP5  
TBX15  
FOXF2  
ZIC3  
HOXC11  
GRIK2  
DLX5  
HTRA4  
HOXD12  
FOXD2

|  |          |
|--|----------|
|  | ZNF146   |
|  | DLX6     |
|  | NKX2-3   |
|  | HOXB13   |
|  | VAX2     |
|  | HOXC4    |
|  | NR2E1    |
|  | DPP6     |
|  | OTX2     |
|  | PRDM14   |
|  | IRX1     |
|  | HOXA1    |
|  | OSR1     |
|  | GRK7     |
|  | TWIST1   |
|  | SIX3     |
|  | TFAP2C   |
|  | HOXD3    |
|  | TITF1    |
|  | SSTR1    |
|  | PRDM1    |
|  | PCDHGA11 |
|  | ZNF329   |
|  | MSX1     |
|  | HOXD8    |
|  | HOXA9    |
|  | ZNF274   |
|  | CDX2     |
|  | FOYG1B   |
|  | SFMBT2   |
|  | KIAA1024 |
|  | DMRT2    |





Legend:

B - Beta (measure of methylation proportion)

Brank - Beta Rank (refer below)

M - M-value ( $\log_2(\text{methylated probe}/\text{unmethylated probe})$ )

FDR - P-value adjusted by False Discover Rate

H358 $\cap$ H460

| <b>Beta Rank</b> | <b>Beta</b> |
|------------------|-------------|
| 1                | [0.0, 0.2)  |
| 2                | [0.2, 0.4)  |
| 3                | [0.4, 0.6]  |
| 4                | (0.6, 0.8]  |
| 5                | (0.8, 1.0]  |



**Table S3: List of commonly upregulated genes in lung cancer**

| References                                                                                                                      | Descriptions                   | Gene                                                                                                                                                                                                                                                                                                                                                                                                     |
|---------------------------------------------------------------------------------------------------------------------------------|--------------------------------|----------------------------------------------------------------------------------------------------------------------------------------------------------------------------------------------------------------------------------------------------------------------------------------------------------------------------------------------------------------------------------------------------------|
| <p>Beer DG et al. Gene-expression profile predict survival of patients with lung adenocarcinoma. Nat Med 2002; 8(8): 816-24</p> | <p>Tumor samples vs normal</p> | <p>ADM<br/> AGFG1<br/> ALDH3B2<br/> ALDOA<br/> BZW1<br/> CDC6<br/> CDS1<br/> CRK<br/> CSTB<br/> DBP<br/> DEFB1<br/> EIF1<br/> ERBB2<br/> FADD<br/> FEZ2<br/> FUCA1<br/> FURIN<br/> FUT3<br/> FXVD3<br/> GAPDH<br/> GARS<br/> GCNT1<br/> GRB7<br/> H2AFZ<br/> HCFC1R1<br/> HMBS<br/> HPCAL1<br/> HSPA8<br/> HSU53209<br/> INHA<br/> ITGA2<br/> KIAA0020<br/> KIAA0317<br/> KRT18<br/> KRT19<br/> KRT7</p> |

|                                                                                                                                                                                                                       |                      |                                                                                                                                                                                                                                                                                                                                                                                 |
|-----------------------------------------------------------------------------------------------------------------------------------------------------------------------------------------------------------------------|----------------------|---------------------------------------------------------------------------------------------------------------------------------------------------------------------------------------------------------------------------------------------------------------------------------------------------------------------------------------------------------------------------------|
|                                                                                                                                                                                                                       |                      | <p> KYNU<br/> MSH3<br/> NFYC<br/> NME2<br/> P2RX5<br/> PDAP1<br/> PDE7A<br/> PEX7<br/> POLD3<br/> PPIF<br/> REG1A<br/> RPS26<br/> RPS3<br/> RPS6KB1<br/> RTCD1<br/> S100P<br/> SCGB2A2<br/> SERPINE1<br/> SLC20A1<br/> SLC2A1<br/> STARD3<br/> STC1<br/> STX1A<br/> TMF1<br/> TP63<br/> TPBG<br/> TTLL12<br/> TUBA4A<br/> UGP2<br/> VDAC2<br/> VEGFA<br/> WNT1<br/> WNT10B </p> |
| <p> Kettunen E et al. Differentially expressed genes in nonsmall cell lung cancer: expression profiling of cancer-related genes in squamous cell lung cancer. <i>Cancer Genet Cytogenet</i> 2004; 149(2): 98-106 </p> | <p>Tumor samples</p> | <p> COL2A1<br/> DSC3<br/> IGFBP5<br/> ITGA6<br/> ITGB4<br/> JAG1 </p>                                                                                                                                                                                                                                                                                                           |

|                                                                                                                                                      |                                                    |                                                                                                                                                                                                                                                                                                                             |
|------------------------------------------------------------------------------------------------------------------------------------------------------|----------------------------------------------------|-----------------------------------------------------------------------------------------------------------------------------------------------------------------------------------------------------------------------------------------------------------------------------------------------------------------------------|
|                                                                                                                                                      |                                                    | <p>KRT10<br/> KRT14<br/> KRT2<br/> MIF<br/> NGFR<br/> RARG</p>                                                                                                                                                                                                                                                              |
| <p>Risch A &amp; Plass C. Lung Cancer epigenetics and genetics. Int J Cancer 2008; 123(1): 1-7</p>                                                   | <p>Review citing from studies on tumor samples</p> | <p>BCL2<br/> CCND1<br/> EGFR<br/> MYC</p>                                                                                                                                                                                                                                                                                   |
| <p>Valk K et al. Gene-expression profiles of non-small cell lung cancer: Survival Prediction and New Biomarkers. Oncology 2010; 79(3-4): 283-292</p> | <p>Tumor Samples vs. normal</p>                    | <p>ANLN<br/> ASPM<br/> AURKA<br/> AURKB<br/> BIK<br/> BUB1B<br/> CCNA2<br/> CCNB1<br/> CCNB2<br/> CCT5<br/> CDC20<br/> CDC45<br/> CDCA8<br/> CDK1<br/> CDKN3<br/> CEP55<br/> CKS1B<br/> COL3A1<br/> COL7A1<br/> FAP<br/> FEN1<br/> FOXM1<br/> GMNN<br/> HMMR<br/> IGFBP3<br/> KIAA0101<br/> KIF11<br/> KIF14<br/> LOXL2</p> |

|                                                                                                                                        |                 |                                                                                                                                                                                                |
|----------------------------------------------------------------------------------------------------------------------------------------|-----------------|------------------------------------------------------------------------------------------------------------------------------------------------------------------------------------------------|
|                                                                                                                                        |                 | MCM2<br>MDK<br>MIF<br>MMP1<br>MMP11<br>MMP9<br>MYBL2<br>NCAPH<br>NDC80<br>PAK1<br>PTTG2<br>SPP1<br>TIMP1<br>TK1<br>TMPRSS4<br>TTK<br>TYMS<br>UHRF1                                             |
| Hou et al. Gene Expression-Based Classification of Non-Small Cell Lung Carcinomas and Survival Prediction. PloS one 2010; 5(4): e10312 | Tumor vs Normal | ABP1<br>ADAM12<br>ADAM28<br>ADAMDEC1<br>AIM2<br>AK4<br>AKR1B10<br>ANKRD22<br>ANLN<br>ARNTL2<br>ASPM<br>ATAD2<br>AURKA<br>AURKB<br>BCL11A<br>BIRC5<br>BLM<br>BRIP1<br>BUB1<br>BUB1B<br>C11orf80 |

|  |          |
|--|----------|
|  | C16orf75 |
|  | C2CD4A   |
|  | C4orf7   |
|  | C7orf68  |
|  | C9orf140 |
|  | CASC5    |
|  | CCDC34   |
|  | CCNA2    |
|  | CCNB1    |
|  | CCNB2    |
|  | CCNE1    |
|  | CCNE2    |
|  | CDC20    |
|  | CDC45    |
|  | CDC6     |
|  | CDCA2    |
|  | CDCA3    |
|  | CDCA5    |
|  | CDCA7    |
|  | CDCA8    |
|  | CDK1     |
|  | CDKN2A   |
|  | CDKN3    |
|  | CDT1     |
|  | CENPA    |
|  | CENPE    |
|  | CENPF    |
|  | CENPK    |
|  | CENPN    |
|  | CEP55    |
|  | CHEK1    |
|  | CLDN10   |
|  | COCH     |
|  | COL10A1  |
|  | COL11A1  |
|  | COL1A1   |
|  | COL3A1   |
|  | COL5A2   |
|  | CPS1     |

|  |  |          |
|--|--|----------|
|  |  | CRABP2   |
|  |  | CTHRC1   |
|  |  | CTTN     |
|  |  | CXCL13   |
|  |  | CXCL9    |
|  |  | CXorf61  |
|  |  | CYP24A1  |
|  |  | DEPDC1   |
|  |  | DEPDC1B  |
|  |  | DERL3    |
|  |  | DLGAP5   |
|  |  | DNAH14   |
|  |  | DNAJC12  |
|  |  | DSCC1    |
|  |  | DSP      |
|  |  | DTL      |
|  |  | DUSP4    |
|  |  | E2F8     |
|  |  | ECT2     |
|  |  | EGLN3    |
|  |  | EPR1     |
|  |  | ERO1L    |
|  |  | EXO1     |
|  |  | EZH2     |
|  |  | FAM72A   |
|  |  | FAM72B   |
|  |  | FAM72C   |
|  |  | FAM72D   |
|  |  | FAM83A   |
|  |  | FAM83D   |
|  |  | FANCI    |
|  |  | FAP      |
|  |  | FBXO32   |
|  |  | FCRL5    |
|  |  | FERMT1   |
|  |  | FGB      |
|  |  | FGL1     |
|  |  | FLJ40330 |
|  |  | FNDC1    |

|  |  |           |
|--|--|-----------|
|  |  | FOXM1     |
|  |  | GABBR1    |
|  |  | GALNT14   |
|  |  | GCNT3     |
|  |  | GIN1      |
|  |  | GIN2      |
|  |  | GJB2      |
|  |  | GNG4      |
|  |  | GOLM1     |
|  |  | GPT2      |
|  |  | GPX2      |
|  |  | GREM1     |
|  |  | GTSE1     |
|  |  | HELLS     |
|  |  | HIST1H2BC |
|  |  | HIST1H2BD |
|  |  | HIST1H2BG |
|  |  | HIST1H2BH |
|  |  | HIST3H2A  |
|  |  | HJURP     |
|  |  | HMGB3     |
|  |  | HMGB3L1   |
|  |  | HMMR      |
|  |  | HN1       |
|  |  | HOXC10    |
|  |  | HOXC6     |
|  |  | HS6ST2    |
|  |  | IGF2BP3   |
|  |  | IGFBP3    |
|  |  | IGHA1     |
|  |  | IGHA2     |
|  |  | IGHD      |
|  |  | IGHG1     |
|  |  | IGHG2     |
|  |  | IGHG3     |
|  |  | IGHG4     |
|  |  | IGHM      |
|  |  | IGHV1-69  |
|  |  | IGHV2-70  |

|  |  |              |
|--|--|--------------|
|  |  | IGHV3-23     |
|  |  | IGHV3-48     |
|  |  | IGHV4-31     |
|  |  | IGHV4-59     |
|  |  | IGK@         |
|  |  | IGKC         |
|  |  | IGKV1-5      |
|  |  | IGKV3-20     |
|  |  | IGKV3D-15    |
|  |  | IGKV4-1      |
|  |  | IGL@         |
|  |  | IGLJ3        |
|  |  | IGLV1-36     |
|  |  | IGLV1-40     |
|  |  | IGLV1-44     |
|  |  | IGLV3-19     |
|  |  | IQGAP3       |
|  |  | KIAA0101     |
|  |  | KIF11        |
|  |  | KIF14        |
|  |  | KIF15        |
|  |  | KIF18B       |
|  |  | KIF20A       |
|  |  | KIF23        |
|  |  | KIF2C        |
|  |  | KIF4A        |
|  |  | KISS1R       |
|  |  | KNTC1        |
|  |  | KRT17        |
|  |  | KRT6A        |
|  |  | KRT6B        |
|  |  | KRT6C        |
|  |  | LGR4         |
|  |  | LGSN         |
|  |  | LOC100290006 |
|  |  | LOC100291917 |
|  |  | LOC652694    |
|  |  | LOC84740     |
|  |  | LOC96610     |



|  |  |          |
|--|--|----------|
|  |  | LRRC15   |
|  |  | LY6K     |
|  |  | MAD2L1   |
|  |  | MAGEA3   |
|  |  | MAGEA6   |
|  |  | MCM10    |
|  |  | MCM2     |
|  |  | MCM4     |
|  |  | MDK      |
|  |  | MELK     |
|  |  | MGC29506 |
|  |  | MKI67    |
|  |  | MLF1IP   |
|  |  | MMP1     |
|  |  | MMP12    |
|  |  | MMP9     |
|  |  | MND1     |
|  |  | MS4A1    |
|  |  | MYBL2    |
|  |  | NCAPG    |
|  |  | NDC80    |
|  |  | NEK2     |
|  |  | NFE2L3   |
|  |  | NMU      |
|  |  | NUF2     |
|  |  | NUSAP1   |
|  |  | OIP5     |
|  |  | ORC6L    |
|  |  | PAEP     |
|  |  | PAFAH1B3 |
|  |  | PAICS    |
|  |  | PBK      |
|  |  | PCP4     |
|  |  | PI15     |
|  |  | PITX2    |
|  |  | PLEK2    |
|  |  | POSTN    |
|  |  | POU2AF1  |
|  |  | PPAT     |

|  |  |          |
|--|--|----------|
|  |  | PRC1     |
|  |  | PRR11    |
|  |  | PSAT1    |
|  |  | PTTG1    |
|  |  | PYCR1    |
|  |  | RAD51    |
|  |  | RAD51AP1 |
|  |  | RALGPS2  |
|  |  | RASSF6   |
|  |  | RFC4     |
|  |  | RNASEH2A |
|  |  | RRM2     |
|  |  | SCG5     |
|  |  | SERPINB5 |
|  |  | SGOL2    |
|  |  | SHCBP1   |
|  |  | SIX1     |
|  |  | SLAMF7   |
|  |  | SLC12A8  |
|  |  | SLC16A14 |
|  |  | SLC2A1   |
|  |  | SLC2A5   |
|  |  | SLC44A5  |
|  |  | SLC6A10P |
|  |  | SLC6A8   |
|  |  | SOX4     |
|  |  | SPAG4    |
|  |  | SPAG5    |
|  |  | SPC25    |
|  |  | SPINK1   |
|  |  | SPP1     |
|  |  | SRD5A1   |
|  |  | STIL     |
|  |  | SULF1    |
|  |  | SYT13    |
|  |  | TFAP2A   |
|  |  | TFF1     |
|  |  | THBS2    |
|  |  | THY1     |

|                                                                                                                                          |                                   |                                                                                                                                                                                                                                                                                  |
|------------------------------------------------------------------------------------------------------------------------------------------|-----------------------------------|----------------------------------------------------------------------------------------------------------------------------------------------------------------------------------------------------------------------------------------------------------------------------------|
|                                                                                                                                          |                                   | TK1<br>TMPRSS4<br>TNNT1<br>TOP2A<br>TPX2<br>TRIM59<br>TRIP13<br>TTK<br>TUBB2B<br>TYMS<br>UBD<br>UBE2C<br>UBE2S<br>UBE2T<br>UCHL1<br>UCK2<br>UGT1A1<br>UGT1A10<br>UGT1A3<br>UGT1A4<br>UGT1A5<br>UGT1A6<br>UGT1A7<br>UGT1A8<br>UGT1A9<br>UGT8<br>UHRF1<br>WDR72<br>ZWILCH<br>ZWINT |
| Zhang WC, et al. Glycine Decarboxylase Activity Drives Non-Small Cell Lung Cancer Tumor-initiating cells and tumorigenesis. Cell (2012). | Tumor samples enriched with CD166 | ABCC3<br>AGR2<br>AKR1B10<br>ANLN<br>BAIAP2L1<br>C1orf106<br>C6orf168<br>CD24<br>CDC20                                                                                                                                                                                            |

|  |  |           |
|--|--|-----------|
|  |  | CDCA7     |
|  |  | CDH1      |
|  |  | CDH3      |
|  |  | CEACAM1   |
|  |  | CLDN10    |
|  |  | CLDN3     |
|  |  | COL10A1   |
|  |  | COL1A1    |
|  |  | COL1A2    |
|  |  | COL3A1    |
|  |  | CP        |
|  |  | CRABP2    |
|  |  | CXCL13    |
|  |  | CXCL14    |
|  |  | DNAJC12   |
|  |  | DNAJC12   |
|  |  | DNAJC12   |
|  |  | EPCAM     |
|  |  | ERO1L     |
|  |  | FAM199X   |
|  |  | FERMT1    |
|  |  | GCNT3     |
|  |  | GGCT      |
|  |  | GREM1     |
|  |  | HIST1H2BD |
|  |  | HMGA1     |
|  |  | HMGB3     |
|  |  | HS6ST2    |
|  |  | IGF2BP3   |
|  |  | IGFBP2    |
|  |  | IGFBP3    |
|  |  | KCNK1     |
|  |  | KDEL2     |
|  |  | KDEL3     |
|  |  | KIAA0101  |
|  |  | KIAA0101  |
|  |  | LAPTM4B   |
|  |  | LCN2      |
|  |  | LSR       |

|  |  |                                                                                                                                                                                                                                                                                                                     |
|--|--|---------------------------------------------------------------------------------------------------------------------------------------------------------------------------------------------------------------------------------------------------------------------------------------------------------------------|
|  |  | MDK<br>MMP1<br>MMP12<br>MMP7<br>NME1<br>NME1<br>NME1<br>NQO1<br>PAICS<br>PAICS<br>PHLDA2<br>PLA2G4A<br>PPAP2C<br>PRDX4<br>PSAT1<br>PTGFRN<br>RRM2<br>S100A2<br>S100P<br>SLC7A11<br>SMPDL3B<br>SORD<br>SPINK1<br>SPP1<br>SRD5A1<br>ST14<br>SULF1<br>THBS2<br>TMEM106B<br>TMPRSS4<br>TOP2A<br>TRIM2<br>WFDC2<br>ZWINT |
|--|--|---------------------------------------------------------------------------------------------------------------------------------------------------------------------------------------------------------------------------------------------------------------------------------------------------------------------|



**Table S5: List of OGs identified in cancer cells that were downregulated upon reprogramming.**

| List of OGs identified in H358 that were downregulated upon reprogramming |                                                                                                                        |          |                |             |             |             |              |                     |                       |                     |                       |                           |
|---------------------------------------------------------------------------|------------------------------------------------------------------------------------------------------------------------|----------|----------------|-------------|-------------|-------------|--------------|---------------------|-----------------------|---------------------|-----------------------|---------------------------|
| geneSymbol                                                                | geneName                                                                                                               | entrezID | accNum         | IMR90_M     | H358_M      | iPCH358_M   | piPCH358_log | log(H358_M-IMR90_M) | log(iPCH358_M-H358_M) | FDR(H358_M-IMR90_M) | FDR(iPCH358_M-H358_M) | FDR(piPCH358_M-IPCH358_M) |
| EFNA1                                                                     | Homo sapiens ephrin-A1 (EFNA1), transcript variant 1, mRNA.                                                            | 1942     | NM_004428.2    | 4.247927513 | 9.418225588 | 6.76431591  | 6.375399729  | 5.170298074         | -2.653893997          | 0.000232311         | 0.004491135           | 1                         |
| CXCL1                                                                     | Homo sapiens chemokine (C-X-C motif) ligand 1 (melanoma growth stimulating activity, alpha) (CXCL1), mRNA.             | 2919     | NM_001511.1    | 5.695097871 | 9.572064793 | 4.247927513 | 4.247927513  | 3.876696922         | -5.324137279          | 0                   | 0.039708178           | 1                         |
| CXCL2                                                                     | Homo sapiens chemokine (C-X-C motif) ligand 2 (CXCL2), mRNA.                                                           | 2920     | NM_002089.3    | 4.247927513 | 7.322556059 | 4.247927513 | 4.247927513  | 3.074628546         | -3.074628546          | 0                   | 0.009583053           | 1                         |
| ID1                                                                       | Homo sapiens inhibitor of DNA binding 1, dominant negative helix-loop-helix protein (ID1), transcript variant 2, mRNA. | 3397     | NM_181353.1    | 8.237489413 | 11.47685306 | 6.050191838 | 7.076549726  | 3.239363644         | -5.42666122           | 1.026357889         | 0.000857332           | 0.783285728               |
| JUP                                                                       | Homo sapiens junction plakoglobin (JUP), transcript variant 2, mRNA.                                                   | 3728     | NM_021991.1    | 8.874473618 | 11.05583735 | 8.453374153 | 8.539220587  | 2.181363732         | -2.602463197          | 0.085846434         | 0.00714489            | 1                         |
| S100P                                                                     | Homo sapiens S100 calcium binding protein P (S100P), mRNA.                                                             | 6286     | NM_005980.2    | 4.247927513 | 11.20758241 | 4.247927513 | 4.247927513  | 6.959654898         | -6.959654898          | 0                   | 0.001103273           | 1                         |
| SPP1                                                                      | Homo sapiens secreted phosphoprotein 1 (SPP1), transcript variant 2, mRNA.                                             | 6696     | NM_000582.2    | 4.247927513 | 7.861902468 | 4.247927513 | 4.390022365  | 3.613974954         | -3.613974954          | 0.142094852         | 5.05E-05              | 7.78E-05                  |
| RUNX2                                                                     | Homo sapiens runt-related transcription factor 2 (RUNX2), transcript variant 2, mRNA.                                  | 860      | NM_001015051.2 | 4.683202761 | 7.007194709 | 4.247927513 | 4.247927513  | 2.323991948         | -2.759267195          | 0                   | 0.019028605           | 1                         |
| MAP3K8                                                                    | Homo sapiens mitogen-activated protein kinase kinase kinase 8 (MAP3K8), mRNA.                                          | 1326     | NM_005204.2    | 4.247927513 | 6.602793522 | 4.247927513 | 4.247927513  | 2.354866008         | -2.354866008          | 0                   | 0.011213193           | 1                         |
| EPHA1                                                                     | Homo sapiens EPH receptor A1 (EPHA1), mRNA.                                                                            | 2041     | NM_005232.3    | 4.247927513 | 8.757376071 | 4.247927513 | 4.247927513  | 4.509448558         | -4.509448558          | 0                   | 0.000675135           | 1                         |
| ERBB3                                                                     | Homo sapiens v-erb-b2 erythroblastic leukemia viral oncogene homolog 3 (avian) (ERBB3), transcript variant s, mRNA.    | 2065     | NM_001009515.1 | 4.247927513 | 9.430702958 | 6.9268915   | 7.424687304  | 5.182775445         | -2.504013808          | 0.497998153         | 0.000389518           | 1                         |
| EREG                                                                      | Homo sapiens epiregulin (EREG), mRNA.                                                                                  | 2069     | NM_001432.2    | 4.247927513 | 6.917788748 | 4.247927513 | 4.247927513  | 2.669861234         | -2.669861234          | 0                   | 0.010247191           | 1                         |
| LCN2                                                                      | Homo sapiens lipocalin 2 (LCN2), mRNA.                                                                                 | 3934     | NM_005564.3    | 4.247927513 | 13.33485101 | 4.208386711 | 4.247927513  | 9.086923493         | -9.126464296          | 0.039540803         | 0.00263334            | 0.003694607               |
| TACSTD2                                                                   | Homo sapiens tumor-associated calcium signal transducer 2 (TACSTD2), mRNA.                                             | 4070     | NM_002353.1    | 4.247927513 | 12.6099518  | 4.247927513 | 4.247927513  | 8.36202429          | -8.36202429           | 0                   | 5.47E-06              | 7.68E-06                  |
| EPCAM                                                                     | Homo sapiens epithelial cell adhesion molecule (EPCAM), mRNA.                                                          | 4072     | NM_002423.2    | 4.247927513 | 13.06746186 | 7.315248288 | 7.508466913  | 8.819534345         | -5.752213571          | 0.193218626         | 9.93E-06              | 0.001180033               |
| MMP7                                                                      | Homo sapiens matrix metalloproteinase 7 (matrylsin, uterin) (MMP7), mRNA.                                              | 4316     | NM_002423.2    | 4.247927513 | 8.627443131 | 4.247927513 | 4.247927513  | 4.379515617         | -4.379515617          | 0                   | 0.010466226           | 0.013421766               |
| MST1R                                                                     | Homo sapiens macrophage stimulating 1 receptor (c-met-related tyrosine kinase) (MST1R), mRNA.                          | 4486     | NM_002447.2    | 4.247927513 | 7.957914935 | 4.247927513 | 4.247927513  | 3.709987421         | -3.709987421          | 0                   | 0.001706729           | 0.00243089                |
| SREBF1                                                                    | Homo sapiens sterol regulatory element binding transcription factor 1 (SREBF1), transcript variant 1, mRNA.            | 6720     | NM_001005291.1 | 7.618162029 | 9.737849243 | 5.719248909 | 5.311239609  | 2.119687215         | -4.018600334          | -0.40800984         | 0.034905336           | 0.002138814               |
| VAV1                                                                      | Homo sapiens vav 1 guanine nucleotide exchange factor (VAV1), mRNA.                                                    | 7409     | NM_005428.2    | 4.247927513 | 6.361477763 | 4.294463376 | 4.797047463  | 2.11355025          | -2.067014387          | 0.502584087         | 0.015403121           | 0.021208353               |
| ARHGEF5                                                                   | Homo sapiens Rho guanine nucleotide exchange factor (GEF) 5 (ARHGEF5), mRNA.                                           | 7984     | NM_005435.3    | 4.247927513 | 6.256147764 | 4.247927513 | 4.247927513  | 2.00822025          | -2.00822025           | 0                   | 0.000147284           | 0.000239621               |
| PEG10                                                                     | Homo sapiens paternally expressed 10 (PEG10), transcript variant 1, mRNA.                                              | 23089    | NM_015068.3    | 4.247927513 | 7.753477147 | 4.247927513 | 4.247927513  | 2.879620386         | -3.505549634          | 0                   | 0.011853366           | 7.44E-05                  |
| CBLC                                                                      | Homo sapiens Cas-Br-M (murine) ecotropic retroviral transforming sequence c (CBLC), mRNA.                              | 23624    | NM_012116.2    | 4.247927513 | 6.264549688 | 4.247927513 | 4.247927513  | 2.016622174         | -2.016622174          | 0                   | 0.022934193           | 0.028138718               |
| RAB38                                                                     | Homo sapiens RAB38, member RAS oncogene family (RAB38), mRNA.                                                          | 23682    | NM_022387.1    | 6.292413066 | 8.968600584 | 5.281151141 | 5.979301154  | 2.676187518         | -3.687449443          | 0.698150013         | 9.24E-05              | 0.003663093               |
| RAB25                                                                     | Homo sapiens RAB25, member RAS oncogene family (RAB25), mRNA.                                                          | 57111    | NM_020387.2    | 4.247927513 | 11.65646491 | 4.247927513 | 4.247927513  | 7.408537397         | -7.408537397          | 0                   | 1.30E-05              | 2.06E-05                  |
| RAB17                                                                     | Homo sapiens RAB17, member RAS oncogene family (RAB17), mRNA.                                                          | 64284    | NM_022449.1    | 4.247927513 | 9.661579232 | 4.247927513 | 4.247927513  | 5.413651718         | -5.413651718          | 0                   | 7.03E-05              | 0.000106336               |

| List of OGs identified in H460 that were downregulated upon reprogramming |                                                                                                                        |          |             |             |             |             |                     |                       |                     |                       |
|---------------------------------------------------------------------------|------------------------------------------------------------------------------------------------------------------------|----------|-------------|-------------|-------------|-------------|---------------------|-----------------------|---------------------|-----------------------|
| geneSymbol                                                                | geneName                                                                                                               | entrezID | accNum      | IMR90_M     | H460_M      | iPCH460_M   | log(H460_M-IMR90_M) | log(iPCH460_M-H460_M) | FDR(H460_M-IMR90_M) | FDR(iPCH460_M-H460_M) |
| EFNA1                                                                     | Homo sapiens ephrin-A1 (EFNA1), transcript variant 1, mRNA.                                                            | 1942     | NM_004428.2 | 4.247927513 | 10.20934074 | 5.95407019  | 5.961413228         | -4.255270552          | 0.006105777         | 0.025092469           |
| CXCL1                                                                     | Homo sapiens chemokine (C-X-C motif) ligand 1 (melanoma growth stimulating activity, alpha) (CXCL1), mRNA.             | 2919     | NM_001511.1 | 5.695097871 | 11.5472057  | 4.247927513 | 5.852107828         | -7.299278185          | 0.015147775         | 0.000967435           |
| CXCL2                                                                     | Homo sapiens chemokine (C-X-C motif) ligand 2 (CXCL2), mRNA.                                                           | 2920     | NM_002089.3 | 4.247927513 | 8.297494621 | 4.247927513 | 4.049567107         | -4.049567107          | 0.000372551         | 0.000624987           |
| ID1                                                                       | Homo sapiens inhibitor of DNA binding 1, dominant negative helix-loop-helix protein (ID1), transcript variant 2, mRNA. | 3397     | NM_181353.1 | 8.237489413 | 10.24989778 | 5.796304373 | 2.012408366         | -4.453593406          | 0.009418681         | 0.044912459           |
| JUP                                                                       | Homo sapiens junction plakoglobin (JUP), transcript variant 2, mRNA.                                                   | 3728     | NM_021991.1 | 8.874473618 | 11.23884483 | 8.05354804  | 2.36437121          | -3.185296788          | 0.016545167         | 0.025085519           |
| S100P                                                                     | Homo sapiens S100 calcium binding protein P (S100P), mRNA.                                                             | 6286     | NM_005980.2 | 4.247927513 | 10.97868416 | 4.247927513 | 6.730756644         | -6.730756644          | 0.000675716         | 0.001177531           |
| SPP1                                                                      | Homo sapiens secreted phosphoprotein 1 (SPP1), transcript variant 2, mRNA.                                             | 6696     | NM_000582.2 | 4.247927513 | 12.34166532 | 4.247927513 | 8.093737807         | -8.093737807          | 9.17E-05            | 0.00014868            |
| DEFB1                                                                     | Homo sapiens defensin, beta 1 (DEFB1), mRNA.                                                                           | 1672     | NM_005218.3 | 4.247927513 | 13.13271334 | 4.247927513 | 8.88478583          | -8.88478583           | 3.29E-05            | 5.32E-05              |
| SERPINB2                                                                  | Homo sapiens serpin peptidase inhibitor, clade B (ovalbumin), member 2 (SERPINB2), mRNA.                               | 5055     | NM_002575.1 | 7.565686581 | 9.971485427 | 4.247927513 | 2.405798846         | -5.723557914          | 0.00855195          | 2.46E-05              |
| PVT1                                                                      | Homo sapiens Pvt1 oncogene (non-protein coding) (PVT1), non-coding RNA.                                                | 5820     | NR_003367.1 | 5.32386525  | 11.43545246 | 4.934155068 | 6.111587209         | -6.501297392          | 0.000112599         | 0.001429108           |
| SRC                                                                       | Homo sapiens v-src sarcoma (Schmidt-Ruppin A-2) viral oncogene homolog (avian) (SRC), transcript variant 2, mRNA.      | 6714     | NM_198291.1 | 7.933923882 | 10.38395416 | 8.078445065 | 2.450030279         | -2.305509097          | 0.000108271         | 0.006480961           |
| RAB20                                                                     | Homo sapiens RAB20, member RAS oncogene family (RAB20), mRNA.                                                          | 55647    | NM_017817.1 | 4.247927513 | 7.919364601 | 4.247927513 | 3.671437088         | -3.671437088          | 0.005469648         | 0.008592697           |
| AKR1B10                                                                   | Homo sapiens akko-keto reductase family 1, member B10 (aldose reductase) (AKR1B10), mRNA.                              | 57016    | NM_002099.3 | 4.247927513 | 13.24966468 | 4.247927513 | 9.001737169         | -9.001737169          | 3.10E-05            | 5.07E-05              |
| RAB3C                                                                     | Homo sapiens RAB3C, member RAS oncogene family (RAB3C), mRNA.                                                          | 115827   | NM_138453.2 | 4.247927513 | 9.643016759 | 4.247927513 | 5.395089245         | -5.395089245          | 0.001098751         | 0.00190137            |

**Legend:**

M - M-value (log2(Sample intensity))

FDR - P-value adjusted by False Discover Rate

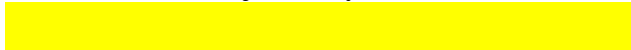

H358∩H460

**Table S6: List of TSs identified in cancer cells that were upregulated upon reprogramming.**

| List of TSs identified in H358 that were upregulated upon reprogramming |                                                                                                               |          |                |             |             |             |             |                     |                       |                           |                     |                       |                           |
|-------------------------------------------------------------------------|---------------------------------------------------------------------------------------------------------------|----------|----------------|-------------|-------------|-------------|-------------|---------------------|-----------------------|---------------------------|---------------------|-----------------------|---------------------------|
| geneSymbol                                                              | geneName                                                                                                      | entrezID | accNum         | IMR90_M     | H358_M      | iPCH358_M   | piPCH358_M  | log(H358_M-IMR90_M) | log(iPCH358_M-H358_M) | log(piPCH358_M-iPCH358_M) | FDR(H358_M-IMR90_M) | FDR(iPCH358_M-H358_M) | FDR(piPCH358_M-iPCH358_M) |
| ALPL                                                                    | Homo sapiens alkaline phosphatase, liver/bone/kidney (ALPL), transcript variant 1, mRNA.                      | 249      | NM_000478.3    | 7.795100115 | 4.467531584 | 8.174977981 | 8.009136379 | -3.327568531        | 3.707446396           | -0.165841601              | 0.01523736          | 0.004046034           | 1                         |
| CCND2                                                                   | Homo sapiens cyclin D2 (CCND2), mRNA.                                                                         | 894      | NM_001759.2    | 10.27632147 | 4.247927513 | 9.437738181 | 8.523925386 | -6.028393958        | 5.189810667           | -0.913812794              | 7.03E-05            | 0.001107741           | 1                         |
| PLAGL1                                                                  | Homo sapiens pleiomorphic adenoma gene-like 1 (PLAGL1), transcript variant 3, mRNA.                           | 5325     | NM_001080951.1 | 7.105535033 | 4.247927513 | 7.126926419 | 7.151122405 | -2.857607519        | 2.878998906           | 0.024195986               | 0.000442278         | 0.00034159            | 1                         |
| CADM1                                                                   | Homo sapiens cell adhesion molecule 1 (CADM1), transcript variant 1, mRNA.                                    | 23705    | NM_014333.3    | 10.36637441 | 4.247927513 | 9.38546736  | 9.000871995 | -6.118446892        | 5.137539846           | -0.38495365               | 5.70E-05            | 0.001505054           | 1                         |
| CA12                                                                    | Homo sapiens carbonic anhydrase XII (CA12), transcript variant 1, mRNA.                                       | 771      | NM_001218.3    | 8.524815847 | 4.247927513 | 7.109658232 | 7.38406416  | -4.276888333        | 2.861730719           | 0.274405928               | 5.28E-05            | 0.000341716           | 1                         |
| FBLN1                                                                   | Homo sapiens fibulin 1 (FBLN1), transcript variant A, mRNA.                                                   | 2192     | NM_006487.2    | 11.81414526 | 6.685880878 | 9.015930357 | 9.306764265 | -5.128264381        | 2.330049479           | 0.290833908               | 0.000142915         | 0.003334851           | 1                         |
| GAS1                                                                    | Homo sapiens growth arrest-specific 1 (GAS1), mRNA.                                                           | 2619     | NM_002048.1    | 8.125312486 | 4.577930152 | 10.12927275 | 9.903133067 | -3.547382334        | 5.551342595           | -0.22613968               | 0.002311989         | 0.000740814           | 1                         |
| GJA1                                                                    | Homo sapiens gap junction protein, alpha 1, 43kDa (GJA1), mRNA.                                               | 2697     | NM_000165.3    | 10.50714393 | 4.247927513 | 7.858575106 | 8.039972897 | -6.259216419        | 3.610647592           | 0.181397791               | 2.84E-05            | 0.002117823           | 1                         |
| HOXA5                                                                   | Homo sapiens homeobox A5 (HOXA5), mRNA.                                                                       | 3202     | NM_019102.2    | 9.93139086  | 7.740408287 | 12.75976082 | 12.48903598 | -2.190982573        | 5.01935253            | -0.270724842              | 0.01412541          | 0.002327925           | 1                         |
| IGFBP5                                                                  | Homo sapiens insulin-like growth factor binding protein 5 (IGFBP5), mRNA.                                     | 3488     | NM_000599.2    | 15.15831636 | 4.345068564 | 6.693926527 | 7.822641058 | -10.8132478         | 2.348857963           | 1.128714531               | 9.24E-06            | 0.03229626            | 1                         |
| KIT                                                                     | Homo sapiens v-kit Hardy-Zuckerman 4 feline sarcoma viral oncogene homolog (KIT), transcript variant 2, mRNA. | 3815     | NM_001093772.1 | 8.133750484 | 4.361215664 | 6.669333508 | 6.521571679 | -3.77253482         | 2.308117844           | -0.147761829              | 0.003151229         | 0.004131816           | 1                         |
| MAP1B                                                                   | Homo sapiens microtubule-associated protein 1B (MAP1B), transcript variant 2, mRNA.                           | 4131     | NM_032010.1    | 9.636943555 | 5.957565475 | 7.990596854 | 7.566182125 | -3.679378079        | 2.033031378           | -0.424414729              | 0.010150785         | 0.030845379           | 1                         |
| HTRA1                                                                   | Homo sapiens HtrA serine peptidase 1 (HTRA1), mRNA.                                                           | 5654     | NM_002775.3    | 11.57090207 | 4.247927513 | 6.344927155 | 6.89566172  | -7.322974554        | 2.06999642            | 0.550734565               | 5.70E-05            | 0.012146371           | 1                         |
| SMO                                                                     | Homo sapiens smoothened homolog (Drosophila) (SMO), mRNA.                                                     | 6608     | NM_005631.3    | 6.875414771 | 4.247927513 | 7.316235762 | 7.165529396 | -2.627487257        | 3.068308249           | -0.150706366              | 0.000364337         | 0.000634267           | 1                         |
| UCHL1                                                                   | Homo sapiens ubiquitin carboxyl-terminal esterase L1 (ubiquitin thiolesterase) (UCHL1), mRNA.                 | 7345     | NM_004181.3    | 12.91768063 | 7.221504453 | 11.77149922 | 11.68571058 | -5.696176182        | 4.54994772            | -0.085788646              | 0.000164925         | 0.000633869           | 1                         |
| BTG2                                                                    | Homo sapiens BTG family, member 2 (BTG2), mRNA.                                                               | 7832     | NM_006763.2    | 7.054502802 | 4.247927513 | 6.646722892 | 6.147949445 | -2.806575289        | 2.398795378           | -0.498773447              | 0.000852036         | 0.004289454           | 1                         |
| KAT2B                                                                   | Homo sapiens K(lysine) acetyltransferase 2B (KAT2B), mRNA.                                                    | 8850     | NM_003884.4    | 7.259617257 | 5.015597497 | 8.171427927 | 8.523938382 | -2.244019761        | 3.155830431           | 0.352510455               | 0.025774379         | 0.010455759           | 1                         |
| RASSF2                                                                  | Homo sapiens Ras association (RafGDS/AF-6) domain family member 2 (RASSF2), transcript variant 2, mRNA.       | 9770     | NM_170774.1    | 7.343944471 | 4.247927513 | 6.561671587 | 6.336537841 | -3.096016957        | 2.313744074           | -0.225133746              | 0.001888477         | 0.010684353           | 1                         |
| EPB41L3                                                                 | Homo sapiens erythrocyte membrane protein band 4.1-like 3 (EPB41L3), mRNA.                                    | 23136    | NM_012307.2    | 7.332014683 | 4.247927513 | 7.860048505 | 8.353701191 | -3.08400717         | 3.612120992           | 0.493652686               | 0.000554104         | 9.53E-05              | 0.533196594               |
| TSPYL2                                                                  | Homo sapiens TSPY-like 2 (TSPYL2), mRNA.                                                                      | 64061    | NM_022117.1    | 7.956868629 | 5.642638403 | 8.054215569 | 7.030405853 | -2.314230226        | 2.411577166           | -1.023809716              | 0.000915075         | 0.00407643            | 0.720939221               |
| CCDC136                                                                 | Homo sapiens coiled-coil domain containing 136 (CCDC136), mRNA.                                               | 64753    | NM_022742.3    | 8.456707331 | 4.914481111 | 9.161872282 | 9.540556825 | -3.54222622         | 4.247391171           | 0.378684542               | 0.000127179         | 0.000704154           | 1                         |

| List of TSs identified in H460 that were upregulated upon reprogramming |                                                                                                                        |          |                |             |             |             |             |                     |                       |                           |                     |                       |                           |
|-------------------------------------------------------------------------|------------------------------------------------------------------------------------------------------------------------|----------|----------------|-------------|-------------|-------------|-------------|---------------------|-----------------------|---------------------------|---------------------|-----------------------|---------------------------|
| geneSymbol                                                              | geneName                                                                                                               | entrezID | accNum         | IMR90_M     | H460_M      | iPCH460_M   | piPCH460_M  | log(H460_M-IMR90_M) | log(iPCH460_M-H460_M) | log(piPCH460_M-iPCH460_M) | FDR(H460_M-IMR90_M) | FDR(iPCH460_M-H460_M) | FDR(piPCH460_M-iPCH460_M) |
| ALPL                                                                    | Homo sapiens alkaline phosphatase, liver/bone/kidney (ALPL), transcript variant 1, mRNA.                               | 249      | NM_000478.3    | 7.795100115 | 4.247927513 | 7.957177189 | 7.957177189 | -3.547172602        | 3.709249675           | -0.012769538              | 0.012769538         | 0.010224651           | 1                         |
| CCND2                                                                   | Homo sapiens cyclin D2 (CCND2), mRNA.                                                                                  | 894      | NM_001759.2    | 10.27632147 | 4.51690323  | 10.01807229 | 10.01807229 | -5.759418242        | 5.501169065           | -0.001252837              | 0.006359006         | 0.006359006           | 1                         |
| PLAGL1                                                                  | Homo sapiens pleiomorphic adenoma gene-like 1 (PLAGL1), transcript variant 3, mRNA.                                    | 5325     | NM_001080951.1 | 7.105535033 | 4.419983748 | 7.208899781 | 7.208899781 | -2.685551285        | 2.788916033           | 0.001543689               | 0.005068682         | 0.005068682           | 1                         |
| CADM1                                                                   | Homo sapiens cell adhesion molecule 1 (CADM1), transcript variant 1, mRNA.                                             | 23705    | NM_014333.3    | 10.36637441 | 5.379390016 | 9.585978902 | 9.585978902 | -4.98706539         | 4.206669886           | 0.006236772               | 0.014985263         | 0.014985263           | 1                         |
| CDKN2A                                                                  | Homo sapiens cyclin-dependent kinase inhibitor 2A (melanoma, p16, inhibits CDK4) (CDKN2A), transcript variant 3, mRNA. | 1029     | NM_058197.3    | 7.888719191 | 4.247927513 | 11.16717146 | 11.16717146 | -3.640791678        | 6.919243942           | 0.00040259                | 0.000861878         | 0.000861878           | 1                         |
| CDKN2B                                                                  | Homo sapiens cyclin-dependent kinase inhibitor 2B (p15, inhibits CDK4) (CDKN2B), transcript variant 2, mRNA.           | 1030     | NM_078487.2    | 6.503157508 | 4.247927513 | 6.395097179 | 6.395097179 | -2.255229995        | 2.147169665           | 0.000217071               | 0.015729684         | 0.015729684           | 1                         |
| FOXO3                                                                   | Homo sapiens forkhead box O3 (FOXO3), transcript variant 2, mRNA.                                                      | 2309     | NM_201559.2    | 11.09002897 | 8.108814853 | 10.57977939 | 10.57977939 | -2.981214115        | 2.470964533           | 0.015147775               | 0.03525379          | 0.03525379            | 1                         |
| SLIT2                                                                   | Homo sapiens slit homolog 2 (Drosophila) (SLIT2), mRNA.                                                                | 9353     | NM_004787.1    | 6.96545246  | 4.424805712 | 9.18802115  | 9.18802115  | -2.540646748        | 4.763215438           | 0.015450578               | 0.023359656         | 0.023359656           | 1                         |

Legend:

M - M-value (log2(Sample intensity))

FDR - P-value adjusted by False Discover Rate

H358∩H460



**Table S7: Primer sequences**

| Primers               | Sequence 5' - 3'                | Applications |
|-----------------------|---------------------------------|--------------|
| hGAPDH F              | TCG ACA GTC AGC CGC ATC T       | qPCR         |
| hGAPDH R              | CTA GCC TCC CGG GTT TCT CT      |              |
| hSOX2 F               | CAA GAT GCA CAA CTC GGA GA      |              |
| hSOX2 R               | GCT TAG CCT CGT CGA TGA AC      |              |
| hOCT3/4 F             | GAA GGA TGT GGT CCG AGT GT      |              |
| hOCT3/4 R             | GCC TCA AAA TCC TCT CGT TG      |              |
| hNANOG F              | ACC TTC CAA TGT GGA GCA AC      |              |
| hNANOG R              | ACT GGA TGT TCT GGG TCT GG      |              |
| hFGF4 F               | GCT GGC TTA AGG ATG GAC AG      |              |
| hFGF4 R               | ACG CTC TCC ATC ACG AGA CT      |              |
| hPAX6 F               | CTT GGG AAA TCC GAG ACA GA      |              |
| hPAX6 R               | CTA GCC AGG TTG CGA AGA AC      |              |
| hCDX2 F               | AAA GGC TTG GCT GGT GTA TG      |              |
| hCDX2 R               | GTC AGG CCT GGA GTC CAA TA      |              |
| hBRACHYURY F          | CCA CCT TCC AAG TGA AGC TC      |              |
| hBRACHYURY R          | CGA AGT CCA TGA GCA GCA TA      |              |
| hGATA4 F              | CCA AGC AGG ACT CTT GGA AC      |              |
| hGATA4 R              | GGG AAG AGG GAA GAT TAC GC      |              |
| hFOXA2 F              | GCT ACT CCT CCG TGA GCA AC      |              |
| hFOXA2 R              | TAC GTG TTC ATG CCG TTC AT      |              |
| hMSX1 F               | GAG TTC TCC AGC TCG CTC AG      |              |
| hMSX1 R               | TCT CCA GCT CTG CCT CTT GT      |              |
| hKRT19 F              | TAG ACC CAG ACC CAC AGA CC      |              |
| hKRT19 R              | CAG CCC CTG TAG GTC ACA AT      |              |
| hCD24 F               | GAG ACT CAG GCC AAG AAA CG      |              |
| hCD24 R               | CCT GTT TTT CCT TGC CAC AT      |              |
| hKRT7 F               | CAG GAA CTC ATG AGC GTG AA      |              |
| hKRT7 R               | GTA GGT GGC GAT CTC GAT GT      |              |
| hKYNU F               | GGG AAA TTC TCT TGG CCT TC      |              |
| hKYNU R               | CCC CAC TTC ATG ACC ATA GG      |              |
| hSERPINB5 F           | CGG GGT AGT TGG CAG AAA TA      |              |
| hSERPINB5 R           | TGG GAA GAA GAG CTT CCA AA      |              |
| hDUSP4 F              | GGG AGG AGG GAA CAA GCT AC      |              |
| hDUSP4 R              | ACC TCT AAG CTG GCA CTC CA      |              |
| hPPAP2C F             | CTG TAT GTG CAG GCA CGA CT      |              |
| hPPAP2C R             | AAA GGC CAC CAG GAA GAA CT      |              |
| hSTX1A F              | GAC CGC TTC ATG GAT GAG TT      |              |
| hSTX1A R              | CGT TCT CTG CGA TCT TGT CA      |              |
| hS100P F              | TAC CAG GCT TCC TGC AGA GT      |              |
| hS100P R              | CAA TTT ATC CAC GGC ATC CT      |              |
| hAGR2 F               | TAT GGC ATG GTG TGC AAA GT      |              |
| hAGR2 R               | AGT GGC GAA AGA AGG TGC TA      |              |
| hHOXA7 F              | ACC TAC ACG CGC TAC CAG AC      |              |
| hHOXA7 R              | AGG TAG CGG TTG AAG TGG AA      |              |
| hRPRM F               | GCA AAC CTG TCG GAG TCA AT      |              |
| hRPRM R               | GGC ATG AGG ACT TTC AGA GG      |              |
| hHOXA5 F              | AGC ACA TGC TCT TTG CCT CT      |              |
| hHOXA5 R              | CTT CAT TCT CCG GTT TTG GA      |              |
| hHOXD13 F             | TAT GGG TCT GGG ATT GTG GT      |              |
| hHOXD13 R             | GCC ACA TTG ATT CAG CCT CT      |              |
| hGALNT14 F            | CTG AGA TGC ACA CTG CTG G       |              |
| hGALNT14 R            | CGT TGT GGA AGG TGA TGA TG      |              |
| hAPC Methylated F     | ATT TTC GTC GGG AGT TCG TC      | MSP          |
| hAPC Methylated R     | CAA CCA CAT ATC GAT CAC GTA CG  |              |
| hAPC Unmethylated F   | TTT TGT TGG GAG TTT GTT GA      |              |
| hAPC Unmethylated R   | CAA CCA CAT ATC AAT CAC ATA CA  |              |
| hHOXC9 Methylated F   | GCG TTA TAT GCG GAT TTG GTT C   |              |
| hHOXC9 Methylated R   | ACG TAA TAA CGA CCC CCG AC      |              |
| hHOXC9 Unmethylated F | TGT TAT ATG TGG ATT TGG TTT GA  |              |
| hHOXC9 Unmethylated R | AAA AAC ATA ATA ACA ACC CCC AAC |              |

|                        |                                     |                      |
|------------------------|-------------------------------------|----------------------|
| hHOXA7 Methylated F    | GCG AGG TTA TTG TAG AGT TCG G       |                      |
| hHOXA7 Methylated R    | AAA ACC CCT TTA CGT CCG AC          |                      |
| hHOXA7 Unmethylated F  | TGG TGA GGT TAT TGT AGA GTT TGG     |                      |
| hHOXA7 Unmethylated R  | TCA AAA CCC CTT TAC ATC CAA C       |                      |
| hKRT19 Methylated F    | TAG GTT TTC GAG GAG GAC GA          |                      |
| hKRT19 Methylated R    | AAA CGA CGA CTC CGT ACG TT          |                      |
| hKRT19 Unmethylated F  | GTA GGT TTT TGA GGA GGA TGA         |                      |
| hKRT19 Unmethylated R  | CCT AAA CAA CAA CTC CAT ACA TT      |                      |
| hHOXA5 Methylated F    | TTT TTT GTT TTT CGG GTC GT          |                      |
| hHOXA5 Methylated R    | CAA ACT TAT CCC CCT AAC GAA         |                      |
| hHOXA5 Unmethylated F  | GGT TTT TTT GTT TTT TGG GTT GT      |                      |
| hHOXA5 Unmethylated R  | CCA AAC TTA TCC CCC TAA CAA A       |                      |
| hHOXD13 Methylated F   | GTT TCG GGG AGT TTC GGT AC          |                      |
| hHOXD13 Methylated R   | ATA CAC CTA ACT ATT CCA CCC GTT     |                      |
| hHOXD13 Unmethylated F | TTT TGG GGA GTT TTG GTA TGA         |                      |
| hHOXD13 Unmethylated R | ATA CAC CTA ACT ATT CCA CCC ATT     |                      |
| hRPRM Methylated F     | TGG GAG CGT ATT CGG ATA CG          |                      |
| hRPRM Methylated R     | AAC CCA ACG ACA CTA ATC GCC         |                      |
| hRPRM Unmethylated F   | TGG GAG TGT ATT TGG ATA TGG         |                      |
| hRPRM Unmethylated R   | AAA AAC CCA ACA ACA CTA ATC ACC     |                      |
| hS100P Methylated F    | TTG TTA GGG AGG AGT TAT CGG         |                      |
| hS100P Methylated R    | TTC TAT TCA ACC CAA CCG AA          |                      |
| hS100P Unmethylated F  | TTG TTA GGG AGG AGT TAT TGG         |                      |
| hS100P Unmethylated R  | TTC TAT TCA ACC CAA CCA AA          |                      |
| KRT19 F                | GGT TTT ATT TGT GGA TTT TTT TA      | Bisulfite sequencing |
| KRT19 R                | AAA CAA AAA CCT AAA CCC TCC C       |                      |
| HOXA5 F                | TTG TTA TAA TGG GTT GTA ATT TTA ATT |                      |
| HOXA5 R                | TAA AAC ATA TAC TTA ATT CCC TCC TAC |                      |

**a***HOXA5*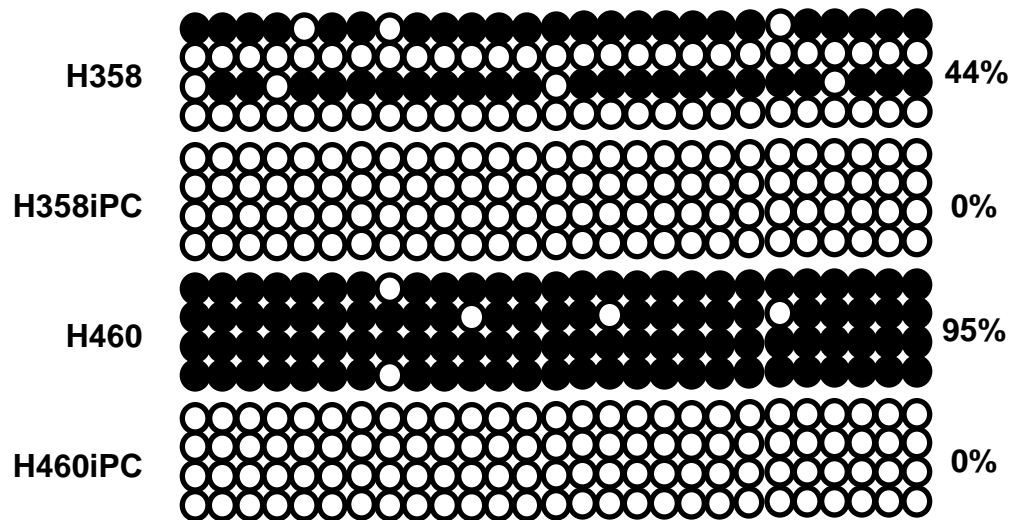**b***KRT19*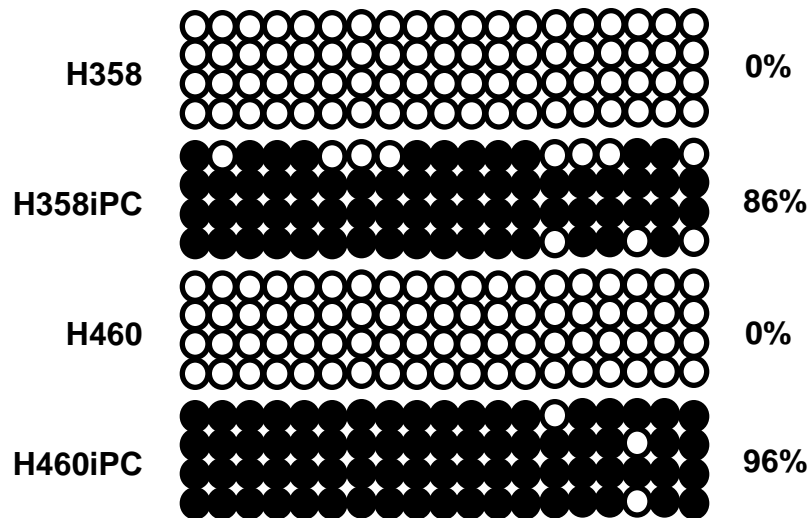**Legends**

- Unmethylated
- Methylated
